# Supplementary material
Source: Springer Nature journal article supplement (https://www.springermedizin.de/resource/supplementary/12894_2009_159_MOESM3_ESM.pdf/9513086)

◆ Observed    — Median predicted response    95% prediction interval

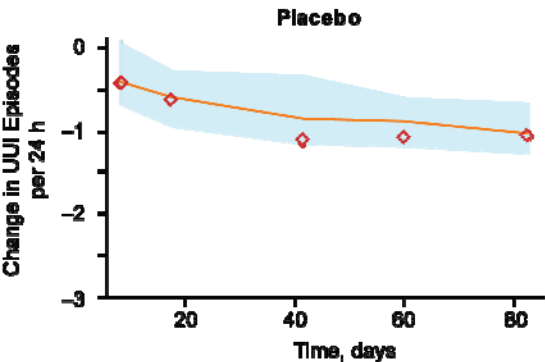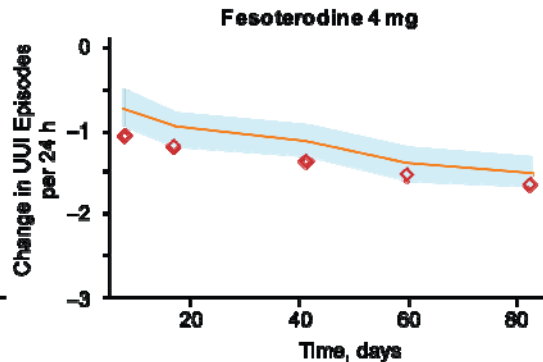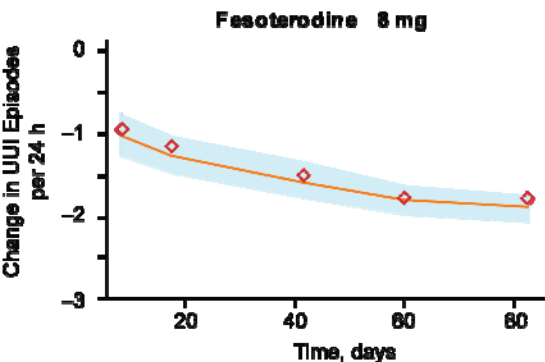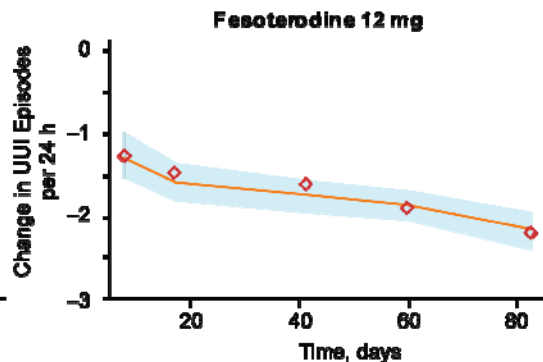

Supplement: MOESM3 [file 9513086]
